# Supplementary material
Source: publisher figshare collection journal article supplement (https://gsajournals.figshare.com/ndownloader/files/15284948)

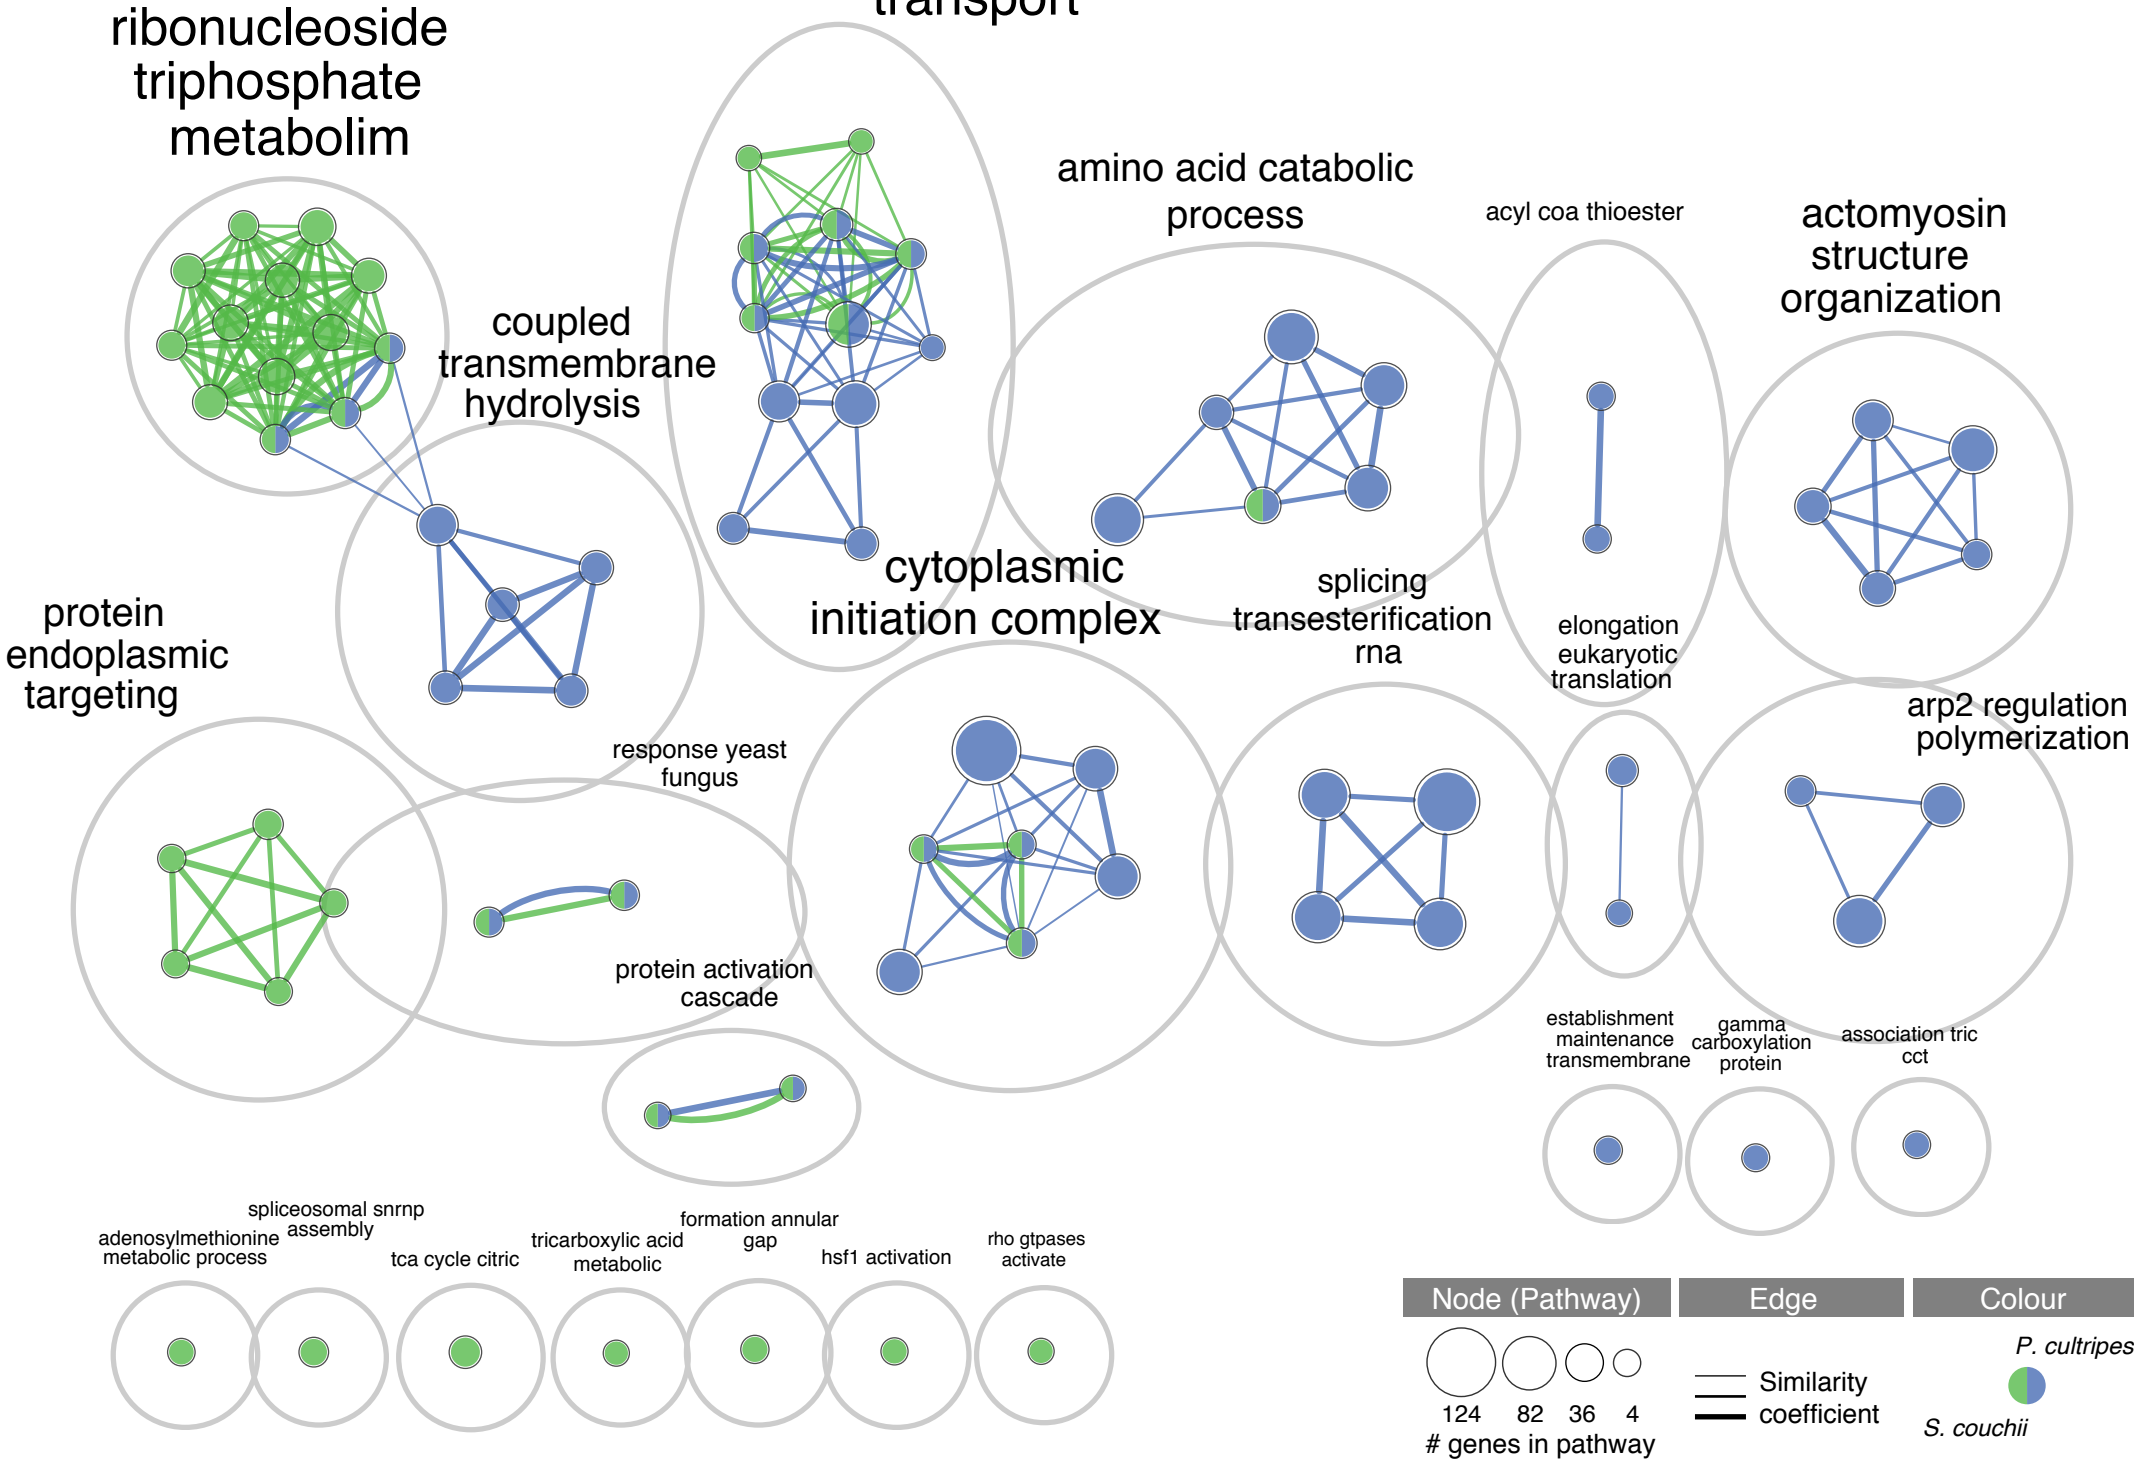

Supplement: Supplementary file 1 [file 15284948]
